# Supplementary material
Source: ML conference proceedings conference paper supplement (https://proceedings.neurips.cc/paper_files/paper/2022/hash/2d69e771d9f274f7c624198ea74f5b98-Abstract.html)
Supplement: Supplementary file 1 [file 2d69e771d9f274f7c624198ea74f5b98-Supplemental-Conference.pdf]

## Supplementary materials

### A On the Definition of $\text{LOT}_{r,c}$

Let  $(\mathcal{X}, d_{\mathcal{X}})$  and  $(\mathcal{Y}, d_{\mathcal{Y}})$  two nonempty compact Polish spaces,  $\mu \in \mathcal{M}_1^+(\mathcal{X})$ ,  $\nu \in \mathcal{M}_1^+(\mathcal{Y})$  two probability measures on these spaces and  $c : \mathcal{X} \times \mathcal{Y} \rightarrow \mathbb{R}_+$  a nonnegative and continuous function. We define the generalized low-rank optimal transport between  $\mu$  and  $\nu$  as

$$\text{LOT}_{r,c}(\mu, \nu) \triangleq \inf_{\pi \in \Pi_r(\mu, \nu)} \int_{\mathcal{X} \times \mathcal{Y}} c(x, y) d\pi(x, y) .$$

where

$$\Pi_r(\mu, \nu) \triangleq \{ \pi \in \Pi(\mu, \nu) : \exists (\mu_i)_{i=1}^r \in \mathcal{M}_1^+(\mathcal{X})^r, (\nu_i)_{i=1}^r \in \mathcal{M}_1^+(\mathcal{Y})^r, \lambda \in \Delta_r^* \text{ s.t. } \pi = \sum_{i=1}^r \lambda_i \mu_i \otimes \nu_i \} .$$

As  $\mathcal{X}$  and  $\mathcal{Y}$  are compact,  $\Pi_r(\mu, \nu)$  is tight, then Prokhorov's theorem applies and the closure of  $\Pi_r(\mu, \nu)$  is sequentially compact. Let us now show that  $\Pi_r(\mu, \nu)$  is closed. Indeed, Let  $(\pi_n)_{n \geq 0}$  a sequence of  $\Pi_r(\mu, \nu)$  converging towards  $\pi_*$ . Then by definition there exists for all  $k \in [1, r]$ ,  $(\mu_n^{(k)})_{n \geq 0}$ ,  $(\nu_n^{(k)})_{n \geq 0}$  and  $(\lambda_n^{(k)})_{n \geq 0}$  such that for all  $n \geq 0$

$$\pi_n = \sum_{i=1}^r \lambda_n^{(i)} \mu_n^{(i)} \otimes \nu_n^{(i)} .$$

However,  $(\mu_n^{(k)})_{n \geq 0}$  and  $(\nu_n^{(k)})_{n \geq 0}$  are also tight, and Prokhorov's theorem applies, therefore we can extract a common subsequence such that for all  $k$ ,

$$\mu_n^{(k)} \rightarrow \mu_*^{(k)} \text{ and } \nu_n^{(k)} \rightarrow \nu_*^{(k)}$$

In addition as  $(\lambda_n)_{n \geq 0}$  live in the simplex  $\Delta_r$ , we can also extract a sub-sequence, such that  $\lambda_n \rightarrow \lambda_* \in \Delta_r$ . Finally by unicity of the limit we obtain that

$$\pi_* = \sum_{k=1}^r \lambda_*^{(k)} \mu_*^{(k)} \otimes \nu_*^{(k)} .$$

Finally, by denoting  $I \triangleq \{k : \lambda_*^{(k)} > 0\}$ , and by considering  $i^* \in I$ , we obtain that

$$\pi_* = \sum_{i \in I \setminus \{i^*\}} \lambda_*^{(i)} \mu_*^{(i)} \otimes \nu_*^{(i)} + \sum_{j=1}^{r-|I|+1} \frac{\lambda_*^{(i^*)}}{r-|I|+1} \mu_*^{(i^*)} \otimes \nu_*^{(i^*)} .$$

from which follows that  $\pi_* \in \Pi_r(\mu, \nu)$ .

## B Proofs

### B.1 Proof of Proposition 1

**Proposition.** Let  $n, m \geq 2$ ,  $\mathbf{X} \triangleq \{x_1, \dots, x_n\} \subset \mathcal{X}$ ,  $\mathbf{Y} \triangleq \{y_1, \dots, y_m\} \subset \mathcal{Y}$  and  $a \in \Delta_n^*$  and  $b \in \Delta_m^*$ . Then for  $2 \leq r \leq \min(n, m)$ , we have that

$$|\text{LOT}_{r,c}(\mu_{a,\mathbf{X}}, \nu_{b,\mathbf{Y}}) - \text{OT}_c(\mu_{a,\mathbf{X}}, \nu_{b,\mathbf{Y}})| \leq \|C\|_{\infty} \ln(\min(n, m)/(r-1))$$

*Proof.* Let  $P \in \arg\min_{P \in \Pi_{a,b}} \langle C, P \rangle$ . As  $P$  is a nonnegative matrix, its nonnegative rank cannot exceed  $\min(n, m)$ . Assume for simplicity, that  $n = m$ , then there exists  $(R_i)_{i=1}^n$  nonnegative matrices of rank 1 such that

$$P = \sum_{i=1}^n R_i .$$

As for all  $i \in [1, n]$ ,  $R_i$  is a rank 1 matrix, there exist  $\tilde{q}_i, \tilde{r}_i \in \mathbb{R}_+^n$  such that  $R_i = \tilde{q}_i \tilde{r}_i^T$ . Then by denoting  $q_i = \tilde{q}_i / |\tilde{q}_i|$ ,  $r_i = \tilde{r}_i / |\tilde{r}_i|$  and  $\lambda_i = |\tilde{q}_i| |\tilde{r}_i|$  where for any  $h \in \mathbb{R}^n$   $|h| \triangleq \sum_{i=1}^n h_i$ , we obtain that

$$P = \sum_{i=1}^n \lambda_i q_i r_i^T.$$

Without loss of generality, we can consider the case where  $\lambda_1 \geq \dots \geq \lambda_n$ . Let us now denote  $\lambda := (\lambda_1, \dots, \lambda_n)$ , and by using the fact the  $P$  is a coupling we obtain that  $\lambda \in \Delta_n$ . Also, by definition of  $\lambda$ , we have that for all  $k \in [1, n]$ ,  $\lambda_k \leq 1/k$ . Let us now define

$$\tilde{P} \triangleq \sum_{i=1}^{r-1} \lambda_i q_i r_i^T + \left( \sum_{i=r}^n \lambda_i \right) \alpha_r \beta_r^T$$

where

$$\alpha_r \triangleq \frac{\sum_{i=r}^n \lambda_i q_i}{\sum_{i=r}^n \lambda_i}$$

$$\beta_r \triangleq \frac{\sum_{i=r}^n \lambda_i r_i}{\sum_{i=r}^n \lambda_i}$$

Remark that  $\tilde{P} \in \Pi_{a,b}(r)$ , therefore we obtain that

$$\begin{aligned} |\text{LOT}_{r,c}(\mu_a, \mathbf{X}, \nu_b, \mathbf{Y}) - \text{OT}_c(\mu_a, \mathbf{X}, \nu_b, \mathbf{Y})| &= \text{LOT}_{r,c}(\mu_a, \mathbf{X}, \nu_b, \mathbf{Y}) - \text{OT}_x(\mu_a, \mathbf{X}, \nu_b, \mathbf{Y}) \\ &\leq \langle C, \tilde{P} \rangle - \langle C, P \rangle \\ &\leq \langle C, \left( \sum_{i=r}^n \lambda_i \right) \alpha_r \beta_r^T \rangle - \langle C, \sum_{i=r}^n \lambda_i q_i r_i^T \rangle \\ &\leq \langle C, \left( \sum_{i=r}^n \lambda_i \right) \alpha_r \beta_r^T \rangle \\ &\leq \|C\|_\infty \sum_{i=r}^n \lambda_i \leq \|C\|_\infty \sum_{i=r}^n \frac{1}{i} \leq \|C\|_\infty \ln(n/(r-1)) \end{aligned}$$

□

## B.2 Proof of Proposition 2

**Proposition 10.** Let  $\mu \in \mathcal{M}_1^+(\mathcal{X})$ ,  $\nu \in \mathcal{M}_1^+(\mathcal{Y})$  and let us assume that  $c$  is  $L$ -Lipschitz w.r.t.  $x$  and  $y$ . Then for any  $r \geq 1$ , we have

$$|\text{LOT}_{r,c}(\mu, \nu) - \text{OT}_c(\mu, \nu)| \leq 2L \max(\mathcal{N}_{\lfloor \log_2(\lfloor \sqrt{r} \rfloor) \rfloor}(\mathcal{X}, d_{\mathcal{X}}), \mathcal{N}_{\lfloor \log_2(\lfloor \sqrt{r} \rfloor) \rfloor}(\mathcal{Y}, d_{\mathcal{Y}}))$$

*Proof.* As  $\mathcal{X}$  and  $\mathcal{Y}$  are compact,  $\mathcal{N}_{\lfloor \log_2(\lfloor \sqrt{r} \rfloor) \rfloor}(\mathcal{X}, d), \mathcal{N}_{\lfloor \log_2(\lfloor \sqrt{r} \rfloor) \rfloor}(\mathcal{Y}, d) < +\infty$  and then by denoting  $\varepsilon_{\mathcal{X}} \triangleq \mathcal{N}_{\lfloor \log_2(\lfloor \sqrt{r} \rfloor) \rfloor}(\mathcal{X}, d_{\mathcal{X}})$ , there exists  $x_1, \dots, x_{\lfloor \sqrt{r} \rfloor} \in \mathcal{X}$ , such that  $\mathcal{X} \subset \bigcup_{i=1}^{\lfloor \sqrt{r} \rfloor} \mathcal{B}_{\mathcal{X}}(x_i, \varepsilon)$  from which we can extract a partition  $(S_{i,\mathcal{X}})_{i=1}^{\lfloor \sqrt{r} \rfloor}$  of  $\mathcal{X}$  such that for all  $i \in [1, \lfloor \sqrt{r} \rfloor]$ , and  $x, y \in S_{i,\mathcal{X}}$ ,  $d_{\mathcal{X}}(x, y) \leq \varepsilon_{\mathcal{X}}$ . Similarly we can build a partition  $(S_{i,\mathcal{Y}})_{i=1}^{\lfloor \sqrt{r} \rfloor}$  of  $\mathcal{Y}$ . Let us now define for all  $k \in [1, \lfloor \sqrt{r} \rfloor]$ ,

$$\mu_k \triangleq \frac{\mu|_{S_{k,\mathcal{X}}}}{\mu(S_{k,\mathcal{X}})} \text{ and } \nu_k \triangleq \frac{\nu|_{S_{k,\mathcal{Y}}}}{\nu(S_{k,\mathcal{Y}})}$$

with the convention that  $\frac{0}{0} = 0$ , we can define

$$\pi_r \triangleq \sum_{i,j=1}^{\lfloor \sqrt{r} \rfloor} \pi^*(S_{i,\mathcal{X}} \times S_{j,\mathcal{Y}}) \nu_j \otimes \mu_i.$$

First remarks that  $\pi_r \in \Pi_r(\mu, \nu)$ . Indeed we have for any measurable set  $B$

$$\begin{aligned}
\pi_r(\mathcal{X} \times B) &= \sum_{j=1}^{\lfloor \sqrt{r} \rfloor^2} \nu_j(B) \sum_{i=1}^r \pi^*(S_{i,\mathcal{X}} \times S_{j,\mathcal{Y}}) \\
&= \sum_{j=1}^{\lfloor \sqrt{r} \rfloor} \nu_j(B) \nu(S_{j,\mathcal{Y}}) \\
&= \sum_{j=1}^{\lfloor \sqrt{r} \rfloor} \nu|_{S_{j,\mathcal{X}}}(B) \\
&= \nu(B) ,
\end{aligned}$$

similarly  $\pi_r(A \times \mathcal{Y}) = \mu(A)$  and we have that  $\lfloor \sqrt{r} \rfloor^2 \leq r$ . Therefore we obtain that

$$\begin{aligned}
|\text{LOT}_{r,c}(\mu, \nu) - \text{OT}_c(\mu, \nu)| &= \text{LOT}_{r,c}(\mu, \nu) - \text{OT}_c(\mu, \nu) \\
&\leq \int_{\mathcal{X} \times \mathcal{Y}} c(x, y) d\pi_r(x, y) - \int_{\mathcal{X} \times \mathcal{Y}} c(x, y) d\pi^*(x, y) \\
&\leq \sum_{i,j=1}^{\lfloor \sqrt{r} \rfloor} \int_{S_{i,\mathcal{X}} \times S_{j,\mathcal{Y}}} c(x, y) d[\pi_r(x, y) - \pi^*(x, y)] \\
&\leq \sum_{i,j=1}^{\lfloor \sqrt{r} \rfloor} \pi^*(S_{i,\mathcal{X}} \times S_{j,\mathcal{Y}}) \\
&\quad \times \left[ \sup_{(x,y) \in S_{i,\mathcal{X}} \times S_{j,\mathcal{Y}}} c(x, y) - \inf_{(x,y) \in S_{i,\mathcal{X}} \times S_{j,\mathcal{Y}}} c(x, y) \right] \\
&\leq L[\varepsilon_{\mathcal{X}} + \varepsilon_{\mathcal{Y}}]
\end{aligned}$$

from which the result follows.  $\square$

**Corollary.** *Under the same assumptions of Proposition [2](#) and by assuming in addition that there exists a Monge map solving  $\text{OT}_c(\mu, \nu)$ , we obtain that for any  $r \geq 1$ ,*

$$|\text{LOT}_{r,c}(\mu, \nu) - \text{OT}_c(\mu, \nu)| \leq L\mathcal{N}_{\lfloor \log_2(r) \rfloor}(\mathcal{Y}, d_{\mathcal{Y}})$$

*Proof.* Let us denote  $T$  a Monge map solution of  $\text{OT}_c(\mu, \nu)$  and as in the proof above, let us consider a partition of  $(S_{i,\mathcal{Y}})_{i=1}^r$  of  $\mathcal{Y}$  such that for all  $i \in [1, r]$ , and  $x, y \in S_{i,\mathcal{Y}}$ ,  $d_{\mathcal{Y}}(x, y) \leq \varepsilon_{\mathcal{Y}}$  with  $\varepsilon_{\mathcal{Y}} \triangleq \mathcal{N}_{\lfloor \log_2(r) \rfloor}(\mathcal{Y}, d_{\mathcal{Y}})$ . Let us now define for all  $k \in [1, \lfloor \sqrt{r} \rfloor]$ ,

$$\mu_k \triangleq \frac{\mu|_{T^{-1}(S_{k,\mathcal{Y}})}}{\mu(T^{-1}(S_{k,\mathcal{Y}}))} \quad \text{and} \quad \nu_k \triangleq \frac{\nu|_{S_{k,\mathcal{Y}}}}{\nu(S_{k,\mathcal{Y}})}$$

with the convention that  $\frac{0}{0} = 0$ , we can define

$$\pi_r \triangleq \sum_{k=1}^r \pi^*(T^{-1}(S_{k,\mathcal{Y}}) \times S_{k,\mathcal{Y}}) \nu_k \otimes \mu_k .$$

Again we have that  $\pi_r \in \Pi_r(\mu, \nu)$ , and we obtain that

$$\begin{aligned}
|\text{LOT}_{r,c}(\mu, \nu) - \text{OT}_c(\mu, \nu)| &= \text{LOT}_{r,c}(\mu, \nu) - \text{OT}_c(\mu, \nu) \\
&\leq \int_{\mathcal{X} \times \mathcal{Y}} c(x, y) d\pi_r(x, y) - \int_{\mathcal{X} \times \mathcal{Y}} c(x, y) d\pi^*(x, y) \\
&\leq \sum_{k=1}^r \pi^*(T^{-1}(S_{k,\mathcal{Y}}) \times S_{k,\mathcal{Y}}) \int_{T^{-1}(S_{k,\mathcal{Y}}) \times S_{k,\mathcal{Y}}} c(x, y) d\mu_k(y) \otimes \nu_k(y) \\
&\quad - \sum_{k=1}^r \int_{T^{-1}(S_{k,\mathcal{Y}})} c(x, T(x)) d\mu(x) \\
&\leq \sum_{k=1}^r \pi^*(T^{-1}(S_{k,\mathcal{Y}}) \times S_{k,\mathcal{Y}}) \int_{T^{-1}(S_{k,\mathcal{Y}}) \times S_{k,\mathcal{Y}}} c(x, y) d\mu_k(y) \otimes \nu_k(y) \\
&\quad - \sum_{k=1}^r \pi^*(T^{-1}(S_{k,\mathcal{Y}}) \times S_{k,\mathcal{Y}}) \int_{T^{-1}(S_{k,\mathcal{Y}}) \times S_{k,\mathcal{Y}}} c(x, T(x)) d\mu_k(x) \otimes \nu_k(y) \\
&\leq \sum_{k=1}^r \pi^*(T^{-1}(S_{k,\mathcal{Y}}) \times S_{k,\mathcal{Y}}) \int_{T^{-1}(S_{k,\mathcal{Y}}) \times S_{k,\mathcal{Y}}} [c(x, y) - c(x, T(x))] d\mu_k(x) \otimes \nu_k(x) \\
&\leq L\varepsilon\gamma
\end{aligned}$$

from which the result follows. Note that to obtain the above inequalities, we use the fact that  $\pi^*$  is supported on the graph of  $T$ , and therefore we have have for all  $k \in [1, r]$ ,

$$\pi^*(T^{-1}(S_{k,\mathcal{Y}}) \times S_{k,\mathcal{Y}}) = \mu(T^{-1}(S_{k,\mathcal{Y}})) = \nu(S_{k,\mathcal{Y}}).$$

□

### B.3 Proof of Proposition 3

**Proposition.** Let  $r \geq 1$  and  $\mu, \nu \in \mathcal{M}_1^+(\mathcal{X})$ , then  $\text{LOT}_{r,c}(\hat{\mu}_n, \hat{\nu}_n) \xrightarrow{n \rightarrow +\infty} \text{LOT}_{r,c}(\mu, \nu)$  a.s.

*Proof.* Let  $\pi^*$  solution of  $\text{LOT}_{r,c}(\mu, \nu)$ . Then there exists  $\lambda^* \in \Delta_r^*$ ,  $(\mu_i^*)_{i=1}^r, (\nu_i^*)_{i=1}^r \in \mathcal{M}_1^+(\mathcal{X})^r$  such that

$$\pi^* = \sum_{i=1}^r \lambda_i^* \mu_i^* \otimes \nu_i^*.$$

Note that by definition, we have that

$$\mu = \sum_{i=1}^r \lambda_i^* \mu_i^* \quad \text{and} \quad \nu = \sum_{i=1}^r \lambda_i^* \nu_i^*.$$

Let us now define  $\pi_\mu$  and  $\pi_\nu$  both elements of  $\mathcal{M}_1^+(\mathcal{X} \times [1, r])$  as follows:

$$\pi_\mu(A \times \{k\}) \triangleq \lambda_k \mu_k(A) \quad \text{and} \quad \pi_\nu(A \times \{k\}) \triangleq \lambda_k \nu_k(A) \quad \text{for any measurable set } A \text{ and } k \in [1, r].$$

Observe that the right marginals of  $\pi_\mu$  and  $\pi_\nu$  is the same and we will denote it  $\rho$ . We can now define for all  $x, y \in \mathcal{X}$  the family of kernels  $(k_\mu(\cdot, x))_{x \in \mathcal{X}} \in \mathcal{M}_1^+([1, r])^\mathcal{X}$  and  $(k_\nu(\cdot, y))_{y \in \mathcal{X}} \in \mathcal{M}_1^+([1, r])^\mathcal{X}$  corresponding to the disintegration with respect to the projection of respectively  $\mu$  and  $\nu$ . Let us now consider  $n$  independent samples  $(Z_i^\mu)_{i=1}^n$  and  $(Z_i^\nu)_{i=1}^n$  such that for all  $i \in [1, n]$ ,  $Z_i^\mu \sim k_\mu(\cdot, X_i)$  and  $Z_i^\nu \sim k_\nu(\cdot, Y_i)$  and let us define for all  $k \in [1, r]$

$$\tilde{\mu}_k \triangleq \frac{1}{n} \sum_{i=1}^n \mathbf{1}_{Z_i^\mu=k} \delta_{X_i} \quad \text{and} \quad \tilde{\nu}_k \triangleq \frac{1}{n} \sum_{i=1}^n \mathbf{1}_{Z_i^\nu=k} \delta_{Y_i}.$$

Let us now define

$$\begin{aligned}
\tilde{\pi} &\triangleq \sum_{k=1}^{r-1} \frac{\min(|\tilde{\mu}_k|, |\tilde{\nu}_k|)}{|\tilde{\mu}_k| |\tilde{\nu}_k|} \tilde{\mu}_k \otimes \tilde{\nu}_k \\
&\quad + \frac{1}{1 - \sum_{k=1}^{r-1} \min(|\tilde{\mu}_k|, |\tilde{\nu}_k|)} \left[ \hat{\mu} - \sum_{k=1}^{r-1} \frac{\min(|\tilde{\mu}_k|, |\tilde{\nu}_k|)}{|\tilde{\mu}_k|} \tilde{\mu}_k \right] \otimes \left[ \hat{\nu} - \sum_{k=1}^{r-1} \frac{\min(|\tilde{\mu}_k|, |\tilde{\nu}_k|)}{|\tilde{\nu}_k|} \tilde{\nu}_k \right]
\end{aligned}$$

with the convention that  $\frac{0}{0} = 0$ . Now it is easy to check that  $\tilde{\pi} \in \Pi_r(\hat{\mu}, \hat{\nu})$ , indeed we have that

$$\begin{aligned}\tilde{\pi}(A \times \mathcal{X}) &= \sum_{k=1}^{r-1} \frac{\min(|\tilde{\mu}_k|, |\tilde{\nu}_k|)}{|\tilde{\mu}_k|} \tilde{\mu}_k(A) \\ &\quad + \frac{1}{1 - \sum_{k=1}^{r-1} \min(|\tilde{\mu}_k|, |\tilde{\nu}_k|)} \left[ \hat{\mu}(A) - \sum_{k=1}^{r-1} \frac{\min(|\tilde{\mu}_k|, |\tilde{\nu}_k|)}{|\tilde{\mu}_k|} \tilde{\mu}_k(A) \right] \left[ 1 - \sum_{k=1}^{r-1} \min(|\tilde{\mu}_k|, |\tilde{\nu}_k|) \right] \\ &= \hat{\mu}(A)\end{aligned}$$

in addition by construction we have that

$$\left| \hat{\mu} - \sum_{k=1}^{r-1} \frac{\min(|\tilde{\mu}_k|, |\tilde{\nu}_k|)}{|\tilde{\mu}_k|} \tilde{\mu}_k \right| = \left| \hat{\nu} - \sum_{k=1}^{r-1} \frac{\min(|\tilde{\mu}_k|, |\tilde{\nu}_k|)}{|\tilde{\nu}_k|} \tilde{\nu}_k \right| = 1 - \sum_{k=1}^{r-1} \min(|\tilde{\mu}_k|, |\tilde{\nu}_k|)$$

and both  $\hat{\mu} - \sum_{k=1}^{r-1} \frac{\min(|\tilde{\mu}_k|, |\tilde{\nu}_k|)}{|\tilde{\mu}_k|} \tilde{\mu}_k$  and  $\hat{\nu} - \sum_{k=1}^{r-1} \frac{\min(|\tilde{\mu}_k|, |\tilde{\nu}_k|)}{|\tilde{\nu}_k|} \tilde{\nu}_k$  are positive measures. Therefore we obtain that

$$\text{LOT}_{r,c}(\hat{\mu}, \hat{\nu}) \leq \int_{\mathcal{X}^2} c(x, y) d\tilde{\pi}(x, y)$$

Now we aim at showing at  $\int_{\mathcal{X}^2} c(x, y) d\tilde{\pi}(x, y) \rightarrow \text{LOT}_{r,c}(\mu, \nu)$  a.s.. Indeed first observe that from the law of large numbers we have that for all  $k \in [1, r]$ ,  $|\tilde{\mu}_k| \rightarrow \lambda_k^*$  and similarly  $|\tilde{\nu}_k| \rightarrow \lambda_k^*$ . In addition, for all  $k, q$  we have that almost surely,  $\tilde{\mu}_k \otimes \tilde{\nu}_q$  converges weakly towards  $\lambda_k^* \lambda_q^* \mu_k \otimes \nu_q$ . Indeed one can consider the following algebra  $\mathcal{F} \triangleq \{(x, y) \in \mathcal{X}^2 \rightarrow f(x)g(y) \mid f, g \in \mathcal{C}(\mathcal{X})\}$ , and then by Stone-Weierstrass, one obtains by density the desired result. Now remark that

$$\begin{aligned}\int_{\mathcal{X}^2} c(x, y) d\tilde{\pi}(x, y) &= \sum_{k=1}^{r-1} \frac{\min(|\tilde{\mu}_k|, |\tilde{\nu}_k|)}{|\tilde{\mu}_k| |\tilde{\nu}_k|} \int_{\mathcal{X}^2} c(x, y) d\tilde{\mu}_k \otimes \tilde{\nu}_k \\ &\quad + \frac{1}{\bar{\lambda}_r} \int_{\mathcal{Z}^2} c(x, y) d\tilde{\mu}_r \otimes \tilde{\nu}_r \\ &\quad + \frac{1}{\bar{\lambda}_r} \sum_{k=1}^{r-1} \left( 1 - \frac{\min(|\tilde{\mu}_k|, |\tilde{\nu}_k|)}{|\tilde{\nu}_k|} \right) \int_{\mathcal{X}^2} c(x, y) d\tilde{\mu}_r \otimes \tilde{\nu}_k \\ &\quad + \frac{1}{\bar{\lambda}_r} \sum_{k=1}^{r-1} \left( 1 - \frac{\min(|\tilde{\mu}_k|, |\tilde{\nu}_k|)}{|\tilde{\mu}_k|} \right) \int_{\mathcal{X}^2} c(x, y) d\tilde{\mu}_k \otimes \tilde{\nu}_r \\ &\quad + \frac{1}{\bar{\lambda}_r} \sum_{k,q=1}^{r-1} \int_{\mathcal{X}^2} \left( 1 - \frac{\min(|\tilde{\mu}_k|, |\tilde{\nu}_k|)}{|\tilde{\mu}_k|} \right) \left( 1 - \frac{\min(|\tilde{\mu}_q|, |\tilde{\nu}_q|)}{|\tilde{\nu}_q|} \right) c(x, y) d\tilde{\mu}_k(x) d\tilde{\nu}_q(y)\end{aligned}$$

from which follows directly that  $\int_{\mathcal{X}^2} c(x, y) d\tilde{\pi}(x, y) \rightarrow \text{LOT}_{r,c}(\mu, \nu)$  a.s. Let us now denote for all  $n \geq 1$ ,  $\pi_n$  a solution of  $\text{LOT}_{r,c}(\hat{\mu}, \hat{\nu})$ . Let  $\omega \in \Omega$  an element of the probability space where live the random variables  $(X_i)_{i \geq 0}$  and  $(Y_i)_{i \geq 0}$  such that  $\int_{\mathcal{X}^2} c(x, y) d\tilde{\pi}^{(\omega)}(x, y) \rightarrow \text{LOT}_{r,c}(\mu, \nu)$ . As  $\mathcal{X}$  is compact Thanks to Prokhorov's Theorem, we can extract a sequence such that  $(\pi_n^{(\omega)})_{n \geq 0}$  converge weakly towards  $\pi^{(\omega)} \in \Pi_r(\mu, \nu)$ . In addition we have that for all  $n \geq 1$

$$\int_{\mathcal{X}^2} c(x, y) d\pi_n^{(\omega)}(x, y) \leq \int_{\mathcal{X}^2} c(x, y) d\tilde{\pi}^{(\omega)}(x, y)$$

And by considering the limit we obtain that

$$\int_{\mathcal{X}^2} c(x, y) d\pi^{(\omega)}(x, y) \leq \text{LOT}_{r,c}(\mu, \nu)$$

However  $\pi^{(\omega)} \in \Pi_r(\mu, \nu)$  and by optimality we obtain that

$$\int_{\mathcal{X}^2} c(x, y) d\pi^{(\omega)}(x, y) = \text{LOT}_{r,c}(\mu, \nu)$$

This holds for an arbitrary subsequence of  $(\pi_n^{(\omega)})_{n \geq 0}$ , from which follows that  $\int_{\mathcal{X}^2} c(x, y) d\pi_n^{(\omega)}(x, y) \rightarrow \text{LOT}_{r,c}(\mu, \nu)$ . Finally this holds almost surely and the result follows.  $\square$

#### B.4 Proof of Proposition 4

**Proposition.** Let  $r \geq 1$  and  $\mu, \nu \in \mathcal{M}_1^+(\mathcal{X})$ . Then, there exists a constant  $K_r$  such that for any  $\delta > 0$  and  $n \geq 1$ , we have, with a probability of at least  $1 - 2\delta$ , that

$$\text{LOT}_{r,c}(\hat{\mu}_n, \hat{\nu}_n) - \text{LOT}_{r,c}(\mu, \nu) \leq 11\|c\|_\infty \sqrt{\frac{r}{n}} + K_r\|c\|_\infty \left[ \sqrt{\frac{\log(40/\delta)}{n}} + \frac{\sqrt{r} \log(40/\delta)}{n} \right]$$

*Proof.* We reintroduce the same notation as in the proof of Proposition 3. Let  $\pi^*$  solution of  $\text{LOT}_{r,c}(\mu, \nu)$ . Then there exists  $\lambda^* \in \Delta_r^*$ ,  $(\mu_i^*)_{i=1}^r, (\nu_i^*)_{i=1}^r \in \mathcal{M}_1^+(\mathcal{Z})^r$  such that

$$\pi^* = \sum_{i=1}^r \lambda_i^* \mu_i^* \otimes \nu_i^*.$$

As before let us also consider  $\pi_\mu$  and  $\pi_\nu$  defined as  $\pi_\mu(A \times \{k\}) \triangleq \lambda_k \mu_k(A)$  and  $\pi_\nu(A \times \{k\}) \triangleq \lambda_k \nu_k(A)$  for any measurable set  $A$  and  $k \in [1, r]$  and denote  $\rho$  their common right marginal. We also consider  $n$  independent samples  $(Z_i^\mu)_{i=1}^n$  and  $(Z_i^\nu)_{i=1}^n$  such that for all  $i \in [1, n]$ ,  $Z_i^\mu \sim k_\mu(\cdot, X_i)$  and  $Z_i^\nu \sim k_\nu(\cdot, Y_i)$  and we denote for all  $k \in [1, r]$

$$\tilde{\mu}_k \triangleq \frac{1}{n} \sum_{i=1}^n \mathbf{1}_{Z_i^\mu=k} \delta_{X_i} \quad \text{and} \quad \tilde{\nu}_k \triangleq \frac{1}{n} \sum_{i=1}^n \mathbf{1}_{Z_i^\nu=k} \delta_{Y_i}$$

Let us now define

$$\hat{\pi} \triangleq \sum_{i=1}^r \frac{1}{\lambda_k^*} \tilde{\mu}_k \otimes \tilde{\nu}_k.$$

Our goal is to control the following quantity:

$$\left| \text{LOT}_{r,c}(\mu, \nu) - \int_{\mathcal{Z}^2} c(x, y) d\hat{\pi}(x, y) \right|,$$

First observe that

$$\begin{aligned} \mathbb{E} \left[ \int_{\mathcal{Z}^2} c(x, y) d\hat{\pi}(x, y) \right] &= \sum_{i=1}^r \frac{1}{\lambda_k^*} \mathbb{E} \left[ \int_{\mathcal{Z}^2} c(x, y) d\tilde{\mu}_k(x) d\tilde{\nu}_k(y) \right] \\ &= \sum_{i=1}^r \frac{1}{\lambda_k^* n^2} \times \sum_{i,j} \mathbb{E} \left[ c(X_i, Y_j) \mathbf{1}_{Z_i^\mu=k} \mathbf{1}_{Z_j^\nu=k} \right] \end{aligned}$$

Moreover, we have that

$$\begin{aligned} \mathbb{E} \left[ c(X_i, Y_j) \mathbf{1}_{Z_i^\mu=k} \mathbf{1}_{Z_j^\nu=k} \right] &= \int_{(\mathcal{Z} \times [1, r])^2} c(x, y) \mathbf{1}_{z=k} \mathbf{1}_{z'=k} d\pi_\mu(x, z) d\pi_\nu(y, z') \\ &= \int_{(\mathcal{Z} \times [1, r])^2} c(x, y) \mathbf{1}_{z=k} \mathbf{1}_{z'=k} d\mu_z(x) d\nu_{z'}(y) d\rho(z) d\rho(z') \\ &= \lambda_k^2 \int_{\mathcal{Z}^2} c(x, y) d\mu_k(x) d\nu_k(y) \end{aligned}$$

from which follows that

$$\mathbb{E} \left[ \int_{\mathcal{Z}^2} c(x, y) d\hat{\pi}(x, y) \right] = \sum_{i=1}^r \lambda_k^* \int_{\mathcal{Z}^2} c(x, y) d\mu_k(x) d\nu_k(y) = \text{LOT}_{r,c}(\mu, \nu)$$

Now let us define for all  $(x_i, z_i)_{i=1}^n, (y_i, z'_i) \in (\mathcal{Z} \times [1, r])^n$ ,

$$g((x_1, z_1), \dots, (x_n, z_n), (y_1, z'_1), \dots, (y_n, z'_n)) \triangleq \sum_{q=1}^r \frac{1}{\lambda_q^* n^2} \sum_{i,j} c(x_i, y_j) \mathbf{1}_{z_i=q} \mathbf{1}_{z'_j=q},$$

since  $\mathcal{Z}$  is compact and  $c$  is continuous, we have that

$$\begin{aligned}
|g(\dots, (x_k, z_k), \dots) - g(\dots, (\tilde{x}_k, \tilde{z}_k), \dots)| &= \left| \sum_{q=1}^r \frac{1}{\lambda_q^* n^2} \sum_j [c(x_k, y_j) \mathbf{1}_{z_k=q} - c(\tilde{x}_k, y_j) \mathbf{1}_{\tilde{z}_k=q}] \mathbf{1}_{z'_j=q} \right| \\
&= \left| \frac{1}{\lambda_{z_k}^* n^2} \sum_{j=1}^n c(x_k, y_j) \mathbf{1}_{z'_j=z_k} - \frac{1}{\lambda_{\tilde{z}_k}^* n^2} \sum_{j=1}^n c(\tilde{x}_k, y_j) \mathbf{1}_{z'_j=\tilde{z}_k} \right| \\
&\leq \frac{\|c\|_\infty}{n^2} \left[ \frac{\sum_{j=1}^n \mathbf{1}_{z'_j=z_k}}{\lambda_{z_k}^*} + \frac{\sum_{j=1}^n \mathbf{1}_{z'_j=\tilde{z}_k}}{\lambda_{\tilde{z}_k}^*} \right] \\
&\leq \frac{2\|c\|_\infty}{\min_{1 \leq q \leq r} \lambda_q^*} \frac{1}{n}
\end{aligned}$$

Then by applying the McDiarmid's inequality we obtain that for  $\delta > 0$ , with a probability at least of  $1 - \delta$ , we have

$$\left| \text{LOT}_{r,c}(\mu, \nu) - \int_{\mathcal{Z}^2} c(x, y) d\hat{\pi}(x, y) \right| \leq \frac{2\|c\|_\infty}{\min_{1 \leq q \leq r} \lambda_q^*} \sqrt{\frac{\log(2/\delta)}{n}}$$

Now we aim at building a coupling  $\tilde{\pi} \in \Pi_r(\hat{\mu}, \hat{\nu})$  from  $\hat{\pi}$ . Let us consider the same as the one introduce in the proof of Proposition [B.3](#), that is

$$\begin{aligned}
\tilde{\pi} &\triangleq \sum_{k=1}^{r-1} \frac{\min(|\tilde{\mu}_k|, |\tilde{\nu}_k|)}{|\tilde{\mu}_k| |\tilde{\nu}_k|} \tilde{\mu}_k \otimes \tilde{\nu}_k \\
&+ \frac{1}{1 - \sum_{k=1}^{r-1} \min(|\tilde{\mu}_k|, |\tilde{\nu}_k|)} \left[ \hat{\mu} - \sum_{k=1}^{r-1} \frac{\min(|\tilde{\mu}_k|, |\tilde{\nu}_k|)}{|\tilde{\mu}_k|} \tilde{\mu}_k \right] \otimes \left[ \hat{\nu} - \sum_{k=1}^{r-1} \frac{\min(|\tilde{\mu}_k|, |\tilde{\nu}_k|)}{|\tilde{\nu}_k|} \tilde{\nu}_k \right]
\end{aligned}$$

with the convention that  $\frac{0}{0} = 0$ . Let us now expand the above expression, and by denoting  $\tilde{\lambda}_r = 1 - \sum_{k=1}^{r-1} \min(|\tilde{\mu}_k|, |\tilde{\nu}_k|)$  we obtain that

$$\begin{aligned}
\tilde{\pi} &= \sum_{k=1}^{r-1} \frac{\min(|\tilde{\mu}_k|, |\tilde{\nu}_k|)}{|\tilde{\mu}_k| |\tilde{\nu}_k|} \tilde{\mu}_k \otimes \tilde{\nu}_k \\
&+ \frac{1}{\tilde{\lambda}_r} \tilde{\mu}_r \otimes \tilde{\nu}_r \\
&+ \frac{1}{\tilde{\lambda}_r} \tilde{\mu}_r \otimes \left[ \sum_{k=1}^{r-1} \left( 1 - \frac{\min(|\tilde{\mu}_k|, |\tilde{\nu}_k|)}{|\tilde{\nu}_k|} \right) \tilde{\nu}_k \right] \\
&+ \frac{1}{\tilde{\lambda}_r} \left[ \sum_{k=1}^{r-1} \left( 1 - \frac{\min(|\tilde{\mu}_k|, |\tilde{\nu}_k|)}{|\tilde{\mu}_k|} \right) \tilde{\mu}_k \right] \otimes \tilde{\nu}_r \\
&+ \frac{1}{\tilde{\lambda}_r} \left[ \sum_{k=1}^{r-1} \left( 1 - \frac{\min(|\tilde{\mu}_k|, |\tilde{\nu}_k|)}{|\tilde{\mu}_k|} \right) \tilde{\mu}_k \right] \otimes \left[ \sum_{k=1}^{r-1} \left( 1 - \frac{\min(|\tilde{\mu}_k|, |\tilde{\nu}_k|)}{|\tilde{\nu}_k|} \right) \tilde{\nu}_k \right]
\end{aligned}$$

Now we aim at controlling the following quantity  $|\int_{\mathbb{Z}^2} c(x, y) d\hat{\pi}(x, y) - \int_{\mathbb{Z}^2} c(x, y) d\tilde{\pi}(x, y)|$  and we observe that

$$\int_{\mathbb{Z}^2} c(x, y) d[\hat{\pi}(x, y) - \tilde{\pi}(x, y)] = \sum_{k=1}^{r-1} \int_{\mathbb{Z}^2} c(x, y) \left[ \frac{1}{\lambda_k^*} - \frac{\min(|\tilde{\mu}_k|, |\tilde{\nu}_k|)}{|\tilde{\mu}_k| |\tilde{\nu}_k|} \right] d\tilde{\mu}_k(x) \tilde{\nu}_k(y) \quad (11)$$

$$+ \int_{\mathbb{Z}^2} c(x, y) \left[ \frac{1}{\tilde{\lambda}_r^*} - \frac{1}{\tilde{\lambda}_r} \right] d\tilde{\mu}_r(x) \tilde{\nu}_r(y) \quad (12)$$

$$+ \frac{1}{\tilde{\lambda}_r} \sum_{k=1}^{r-1} \int_{\mathbb{Z}^2} \left( 1 - \frac{\min(|\tilde{\mu}_k|, |\tilde{\nu}_k|)}{|\tilde{\nu}_k|} \right) c(x, y) d\tilde{\mu}_r(x) d\tilde{\nu}_k(y) \quad (13)$$

$$+ \frac{1}{\tilde{\lambda}_r} \sum_{k=1}^{r-1} \int_{\mathbb{Z}^2} \left( 1 - \frac{\min(|\tilde{\mu}_k|, |\tilde{\nu}_k|)}{|\tilde{\mu}_k|} \right) c(x, y) d\tilde{\mu}_k(x) d\tilde{\nu}_r(y) \quad (14)$$

$$+ \frac{1}{\tilde{\lambda}_r} \sum_{k,q=1}^{r-1} \int_{\mathbb{Z}^2} \left( 1 - \frac{\min(|\tilde{\mu}_k|, |\tilde{\nu}_k|)}{|\tilde{\mu}_k|} \right) \left( 1 - \frac{\min(|\tilde{\mu}_q|, |\tilde{\nu}_q|)}{|\tilde{\nu}_q|} \right) c(x, y) d\tilde{\mu}_k(x) d\tilde{\nu}_q(y) \quad (15)$$

Let us now control each term of the RHS of the above equality. Let us first consider the term in Eq. [11](#), remark that we have

$$\begin{aligned} & \left| \int_{\mathbb{Z}^2} c(x, y) \left[ \frac{1}{\lambda_k^*} - \frac{\min(|\tilde{\mu}_k|, |\tilde{\nu}_k|)}{|\tilde{\mu}_k| |\tilde{\nu}_k|} \right] d\tilde{\mu}_k(x) \tilde{\nu}_k(y) \right| \\ & \leq \left| \left[ \frac{1}{\lambda_k^*} - \frac{\min(|\tilde{\mu}_k|, |\tilde{\nu}_k|)}{|\tilde{\mu}_k| |\tilde{\nu}_k|} \right] \right| \|c\|_{\infty} |\tilde{\mu}_k| |\tilde{\nu}_k| \\ & \leq \left| \left[ \frac{|\tilde{\mu}_k| |\tilde{\nu}_k|}{\lambda_k^*} - \min(|\tilde{\mu}_k|, |\tilde{\nu}_k|) \right] \right| \|c\|_{\infty} \\ & \leq \min(|\tilde{\mu}_k|, |\tilde{\nu}_k|) \left| \frac{\max(|\tilde{\mu}_k|, |\tilde{\nu}_k|)}{\lambda_k^*} - 1 \right| \|c\|_{\infty} \\ & \leq \frac{\min(|\tilde{\mu}_k|, |\tilde{\nu}_k|)}{\lambda_k^*} |\max(|\tilde{\mu}_k|, |\tilde{\nu}_k|) - \lambda_k^*| \|c\|_{\infty} \\ & \leq \frac{\min(|\tilde{\mu}_k|, |\tilde{\nu}_k|)}{\lambda_k^*} \max(\|\tilde{\lambda}_{\mu} - \lambda^*\|_{\infty}, \|\tilde{\lambda}_{\nu} - \lambda^*\|_{\infty}) \|c\|_{\infty} \\ & \leq \|c\|_{\infty} \max \left( \left\| \frac{\tilde{\lambda}_{\mu}}{\lambda^*} \right\|_{\infty}, \left\| \frac{\tilde{\lambda}_{\nu}}{\lambda^*} \right\|_{\infty} \right) \max(\|\tilde{\lambda}_{\mu} - \lambda^*\|_{\infty}, \|\tilde{\lambda}_{\nu} - \lambda^*\|_{\infty}) \end{aligned}$$

where we have denoted  $\tilde{\lambda}_{\mu} \triangleq (|\tilde{\mu}_k|)_{k=1}^r$  and  $\tilde{\lambda}_{\nu} \triangleq (|\tilde{\nu}_k|)_{k=1}^r$ . Now observe that

$$\begin{aligned} \mathbb{P} \left( \max(\|\tilde{\lambda}_{\mu} - \lambda^*\|_{\infty}, \|\tilde{\lambda}_{\nu} - \lambda^*\|_{\infty}) \geq t \right) & \leq 2\mathbb{P} \left( \|\tilde{\lambda}_{\mu} - \lambda^*\|_{\infty} \geq t \right) \\ & \leq \mathbb{P} \left( d_K(\lambda^*, \tilde{\lambda}_{\mu}) \geq \frac{t}{2} \right) \\ & \leq 4 \exp(-nt^2/2) \end{aligned}$$

where  $d_K$  is the Kolmogorov distance. In addition we have

$$\max \left( \left\| \frac{\tilde{\lambda}_{\mu}}{\lambda^*} \right\|_{\infty}, \left\| \frac{\tilde{\lambda}_{\nu}}{\lambda^*} \right\|_{\infty} \right) \leq 1 + \frac{1}{\min_{1 \leq i \leq r} \lambda_i^*} \max(\|\tilde{\lambda}_{\mu} - \lambda^*\|_{\infty}, \|\tilde{\lambda}_{\nu} - \lambda^*\|_{\infty})$$

Combining the two above controls, we obtain that for all  $\delta > 0$ , with a probability of at least  $1 - \delta$ ,

$$\left| \int_{\mathbb{Z}^2} c(x, y) \left[ \frac{1}{\lambda_k^*} - \frac{\min(|\tilde{\mu}_k|, |\tilde{\nu}_k|)}{|\tilde{\mu}_k| |\tilde{\nu}_k|} \right] d\tilde{\mu}_k(x) \tilde{\nu}_k(y) \right| \leq \|c\|_{\infty} \sqrt{\frac{2 \ln 8/\delta}{n}} + \frac{\|c\|_{\infty}}{n} \frac{2 \ln 8/\delta}{\min_{1 \leq i \leq r} \lambda_i^*}$$

Let us now consider the term in Eq. [12](#) we have that

$$\begin{aligned}
\left| \int_{\mathbb{Z}^2} c(x, y) \left[ \frac{1}{\lambda_r^*} - \frac{1}{\tilde{\lambda}_r} \right] d\tilde{\mu}_r(x) \tilde{\nu}_r(y) \right| &\leq \frac{|\tilde{\mu}_r| |\tilde{\nu}_r|}{\lambda_r^* \tilde{\lambda}_r} \left| 1 - \sum_{i=1}^r \min(|\tilde{\mu}_k|, |\tilde{\nu}_k|) - \lambda_r \right| \|c\|_\infty \\
&\leq \max \left( \left\| \frac{\tilde{\lambda}_\mu}{\lambda^*} \right\|_\infty, \left\| \frac{\tilde{\lambda}_\nu}{\lambda^*} \right\|_\infty \right) \sum_{k=1}^{r-1} |\lambda_k^* - \min(|\tilde{\mu}_k|, |\tilde{\nu}_k|)| \|c\|_\infty \\
&\leq \max \left( \left\| \frac{\tilde{\lambda}_\mu}{\lambda^*} \right\|_\infty, \left\| \frac{\tilde{\lambda}_\nu}{\lambda^*} \right\|_\infty \right) \|c\|_\infty (\|\lambda^* - \tilde{\lambda}_\mu\|_1 + \|\lambda^* - \tilde{\lambda}_\nu\|_1) \\
&\leq 2\|c\|_\infty \max \left( \left\| \frac{\tilde{\lambda}_\mu}{\lambda^*} \right\|_\infty, \left\| \frac{\tilde{\lambda}_\nu}{\lambda^*} \right\|_\infty \right) \max(\|\lambda^* - \tilde{\lambda}_\mu\|_1, \|\lambda^* - \tilde{\lambda}_\nu\|_1)
\end{aligned}$$

However we have that

$$\mathbb{P} \left( \max(\|\lambda^* - \tilde{\lambda}_\mu\|_1, \|\lambda^* - \tilde{\lambda}_\nu\|_1) \geq t \right) \leq 2\mathbb{P} \left( \|\lambda^* - \tilde{\lambda}_\mu\|_1 \geq t \right)$$

In addition we have that  $\mathbb{E}(\|\lambda^* - \tilde{\lambda}_\mu\|_1) \leq \sqrt{\frac{r}{n}}$  and by applying the McDiarmid's Inequality, we obtain that for all  $\delta > 0$ , with a probability of  $1 - \delta$

$$\|\lambda^* - \tilde{\lambda}_\mu\|_1 \leq \sqrt{\frac{r}{n}} + \sqrt{\frac{2 \ln(2/\delta)}{n}}$$

Therefore we obtain that with a probability of at least  $1 - \delta$ ,

$$\left| \int_{\mathbb{Z}^2} c(x, y) \left[ \frac{1}{\lambda_r^*} - \frac{1}{\tilde{\lambda}_r} \right] d\tilde{\mu}_r(x) \tilde{\nu}_r(y) \right| \leq 2\|c\|_\infty \left[ \sqrt{\frac{r}{n}} + \sqrt{\frac{2 \ln(8/\delta)}{n}} + \frac{2 \ln(8/\delta) + \sqrt{2r \ln(8/\delta)}}{n \times \min_{1 \leq i \leq r} \lambda_i^*} \right]$$

For the term in Eq. [13](#) and [14](#) we obtain that

$$\begin{aligned}
&\left| \frac{1}{\tilde{\lambda}_r} \sum_{k=1}^{r-1} \int_{\mathbb{Z}^2} \left( 1 - \frac{\min(|\tilde{\mu}_k|, |\tilde{\nu}_k|)}{|\tilde{\nu}_k|} \right) c(x, y) d\tilde{\mu}_r(x) d\tilde{\nu}_k(y) \right| \\
&\leq \frac{|\tilde{\mu}_r|}{\tilde{\lambda}_r} \sum_{k=1}^{r-1} (|\tilde{\nu}_k| - \min(|\tilde{\mu}_k|, |\tilde{\nu}_k|)) \|c\|_\infty \\
&\leq \frac{|\tilde{\mu}_r|}{\tilde{\lambda}_r} [\tilde{\lambda}_r - |\tilde{\nu}_r|] \|c\|_\infty \\
&\leq [|\tilde{\lambda}_r - \lambda_r^*| + |\lambda_r^* - \tilde{\nu}_r|] \|c\|_\infty \\
&\leq 3\|c\|_\infty \max(\|\lambda^* - \tilde{\lambda}_\mu\|_1, \|\lambda^* - \tilde{\lambda}_\nu\|_1)
\end{aligned}$$

Therefore we obtain that with a probability of at least  $1 - \delta$ ,

$$\left| \frac{1}{\tilde{\lambda}_r} \sum_{k=1}^{r-1} \int_{\mathbb{Z}^2} \left( 1 - \frac{\min(|\tilde{\mu}_k|, |\tilde{\nu}_k|)}{|\tilde{\nu}_k|} \right) c(x, y) d\tilde{\mu}_r(x) d\tilde{\nu}_k(y) \right| \leq 3\|c\|_\infty \left[ \sqrt{\frac{r}{n}} + \sqrt{\frac{2 \ln(2/\delta)}{n}} \right]$$

Finally the last term in Eq. [15](#) can be controlled as the following:

$$\begin{aligned}
&\left| \frac{1}{\tilde{\lambda}_r} \sum_{k,q=1}^{r-1} \int_{\mathbb{Z}^2} \left( 1 - \frac{\min(|\tilde{\mu}_k|, |\tilde{\nu}_k|)}{|\tilde{\mu}_k|} \right) \left( 1 - \frac{\min(|\tilde{\mu}_q|, |\tilde{\nu}_q|)}{|\tilde{\nu}_q|} \right) c(x, y) d\tilde{\mu}_k(x) d\tilde{\nu}_q(y) \right| \\
&\leq \frac{\|c\|_\infty}{\tilde{\lambda}_r} \sum_{k,q=1}^{r-1} \left( 1 - \frac{\min(|\tilde{\mu}_k|, |\tilde{\nu}_k|)}{|\tilde{\mu}_k|} \right) \left( 1 - \frac{\min(|\tilde{\mu}_q|, |\tilde{\nu}_q|)}{|\tilde{\nu}_q|} \right) |\tilde{\mu}_k| |\tilde{\nu}_q| \\
&\leq \frac{\|c\|_\infty}{\tilde{\lambda}_r} \sum_{k=1}^{r-1} (|\tilde{\mu}_k| - \min(|\tilde{\mu}_k|, |\tilde{\nu}_k|)) \sum_{q=1}^{r-1} (|\tilde{\nu}_q| - \min(|\tilde{\mu}_q|, |\tilde{\nu}_q|)) \\
&\leq 3\|c\|_\infty \max(\|\lambda^* - \tilde{\lambda}_\mu\|_1, \|\lambda^* - \tilde{\lambda}_\nu\|_1)
\end{aligned}$$

and we obtain that with a probability of at least  $1 - \delta$ ,

$$\begin{aligned} & \left| \frac{1}{\tilde{\lambda}_r} \sum_{k,q=1}^{r-1} \int_{\mathcal{Z}^2} \left( 1 - \frac{\min(|\tilde{\mu}_k|, |\tilde{\nu}_q|)}{|\tilde{\mu}_k|} \right) \left( 1 - \frac{\min(|\tilde{\mu}_k|, |\tilde{\nu}_q|)}{|\tilde{\nu}_q|} \right) c(x, y) d\tilde{\mu}_k(x) d\tilde{\nu}_q(y) \right| \\ & \leq 3\|c\|_\infty \left[ \sqrt{\frac{r}{n}} + \sqrt{\frac{2 \ln(2/\delta)}{n}} \right] \end{aligned}$$

Then by applying a union bound we obtain that with a probability of at least  $1 - \delta$

$$\left| \int_{\mathcal{Z}^2} c(x, y) d[\hat{\pi}(x, y) - \tilde{\pi}(x, y)] \right| \leq \|c\|_\infty \left[ 11\sqrt{\frac{r}{n}} + 12\sqrt{\frac{2 \ln 40/\delta}{n}} + \frac{6 \ln(40/\delta) + 2\sqrt{2r \ln(40/\delta)}}{n \times \min_{1 \leq i \leq r} \lambda_i^*} \right]$$

Now observe that

$$\begin{aligned} \text{LOT}_{r,c}(\hat{\mu}, \hat{\nu}) - \text{LOT}_{r,c}(\mu, \nu) & \leq \int_{\mathcal{Z}^2} c(x, y) d\tilde{\pi}(x, y) - \int_{\mathcal{Z}^2} c(x, y) d\pi^*(x, y) \\ & \leq \int_{\mathcal{Z}^2} c(x, y) d[\tilde{\pi} - \hat{\pi}](x, y) + \int_{\mathcal{Z}^2} c(x, y) d[\hat{\pi} - \pi^*](x, y) \end{aligned}$$

and by combining the two control we obtain that with a probability of at least  $1 - 2\delta$ ,

$$\begin{aligned} \text{LOT}_{r,c}(\hat{\mu}, \hat{\nu}) - \text{LOT}_{r,c}(\mu, \nu) & \leq \|c\|_\infty \left[ 11\sqrt{\frac{r}{n}} + 12\sqrt{\frac{2 \ln 40/\delta}{n}} + \frac{1}{\alpha} \left( 2\sqrt{\frac{\log(2/\delta)}{n}} + \frac{6 \ln(40/\delta) + 2\sqrt{2r \ln(40/\delta)}}{n} \right) \right] \\ & \leq 11\|c\|_\infty \sqrt{\frac{r}{n}} + \frac{14\|c\|_\infty}{\alpha} \sqrt{\frac{\log(40/\delta)}{n}} + \frac{2\|c\|_\infty \max(6, \sqrt{2r}) \log(40/\delta)}{n\alpha} \end{aligned}$$

where  $\alpha \triangleq \min_{1 \leq i \leq r} \lambda_i^*$  and the result follows.  $\square$

## B.5 Proof Proposition 5

**Proposition.** Let  $r \geq 1$ ,  $\delta > 0$  and  $\mu, \nu \in \mathcal{M}_1^+(\mathcal{X})$ . Then there exists a constant  $N_{r,\delta}$  such that if  $n \geq N_{r,\delta}$  then with a probability of at least  $1 - 2\delta$ , we have

$$\text{LOT}_{r,c}(\hat{\mu}_n, \hat{\nu}_n) - \text{LOT}_{r,c}(\mu, \nu) \leq 11\|c\|_\infty \sqrt{\frac{r}{n}} + 77\|c\|_\infty \sqrt{\frac{\log(40/\delta)}{n}}.$$

*Proof.* We consider the same notations as in the proof of Proposition 4. In particular let us define for all  $(x_i, z_i)_{i=1}^n, (y_i, z'_i) \in (\mathcal{Z} \times [1, r])^n$ ,

$$g((x_1, z_1), \dots, (x_n, z_n), (y_1, z'_1), \dots, (y_n, z'_n)) \triangleq \sum_{q=1}^r \frac{1}{\lambda_q^* n^2} \sum_{i,j} c(x_i, y_j) \mathbf{1}_{z_i=q} \mathbf{1}_{z'_j=q},$$

Recall that we have

$$\begin{aligned} |g(\dots, (x_k, z_k), \dots) - g(\dots, (\tilde{x}_k, \tilde{z}_k), \dots)| & \leq \frac{\|c\|_\infty}{n^2} \left[ \frac{\sum_{j=1}^n \mathbf{1}_{z'_j=z_k}}{\lambda_{z_k}^*} + \frac{\sum_{j=1}^n \mathbf{1}_{z'_j=\tilde{z}_k}}{\lambda_{\tilde{z}_k}^*} \right] \\ & \leq \frac{2\|c\|_\infty}{n} \max \left( \left\| \frac{\tilde{\lambda}_\mu}{\lambda^*} \right\|_\infty, \left\| \frac{\tilde{\lambda}_\nu}{\lambda^*} \right\|_\infty \right) \\ & \leq \frac{2\|c\|_\infty}{n} + \frac{2\|c\|_\infty}{n \times \min_{1 \leq i \leq r} \lambda_i^*} \max \left( \|\tilde{\lambda}_\mu - \lambda^*\|_\infty, \|\tilde{\lambda}_\nu - \lambda^*\|_\infty \right) \end{aligned}$$

In fact if we have a control in probability of the bounded difference we can use an extension of the McDiarmid's Inequality. For that purpose let us first introduce the following definition.

**Definition 4.** Let  $(X_i)_{i=1}^m$ ,  $m$  independent random variables and  $g$  a measurable function. We say that  $g$  is weakly difference-bounded with respect to  $(X_i)_{i=1}^m$  by  $(b, \beta, \delta)$  if

$$\mathbb{P}(|g(X_1, \dots, X_m) - g(X'_1, \dots, X'_m)| \leq \beta) \geq 1 - \delta$$

with  $X'_i = X_i$  except for one coordinate  $k$  where  $X'_k$  is an independent copy of  $X_k$ . Furthermore for any  $(x_i)_{i=1}^m$  and  $(x'_i)_{i=1}^m$  where for all coordinate except on  $x_j = x'_j$

$$|g(x_1, \dots, x_m) - g(x'_1, \dots, x'_m)| \leq b.$$

Let us now introduce an extension of McDiarmid's Inequality [Kutin, 2002].

**Theorem 1.** Let  $(X_i)_{i=1}^m$ ,  $m$  independent random variables and  $g$  a measurable function which is weakly difference-bounded with respect to  $(X_i)_{i=1}^m$  by  $(b, \beta/m, \exp(-Km))$ , then if  $0 < \tau \leq T(b, \beta, K)$  and  $m \geq M(b, \beta, K, \tau)$ , then

$$\mathbb{P}(|g(X_1, \dots, X_m) - \mathbb{E}(g(X_1, \dots, X_m))| \geq \tau) \leq 4 \exp\left(\frac{-\tau^2 m}{8\beta^2}\right)$$

where

$$T(b, \beta, K) \triangleq \min\left(\frac{14c}{2}, 4\beta\sqrt{K}, \frac{\beta^2 K}{b}\right)$$

$$M(b, \beta, K, \tau) \triangleq \max\left(\frac{b}{\beta}, \beta\sqrt{40}, 3\left(\frac{24}{K} + 3\right) \log\left(\frac{24}{K} + 3\right), \frac{1}{\tau}\right)$$

Given the above Theorem we can obtain an asymptotic control of the deviation of  $g$  from its mean. Let  $\delta' > 0$  and let us denote

$$m \triangleq 2n$$

$$b \triangleq \frac{2\|c\|_\infty}{n \times \min_{1 \leq i \leq r} \lambda_i^*}$$

$$K \triangleq \frac{\log(1/\delta')}{2n}$$

$$\beta \triangleq 4\|c\|_\infty \left[ 1 + \frac{1}{\min_{1 \leq i \leq r} \lambda_i^*} \sqrt{\frac{2 \log(4/\delta')}{n}} \right]$$

Observe now that with a probability of at least  $1 - \exp(-Km)$

$$|g(\dots, (x_k, z_k), \dots) - g(\dots, (\tilde{x}_k, \tilde{z}_k), \dots)| \leq \frac{2\|c\|_\infty}{n} \left[ 1 + \frac{1}{\min_{1 \leq i \leq r} \lambda_i^*} \sqrt{\frac{2 \log(4/\delta')}{n}} \right]$$

Let us now fix  $\delta > 0$  and let us choose  $\delta'$  such that  $\delta' \triangleq 4/n$  and  $\tau \triangleq \beta \sqrt{\frac{4 \log(4/\delta)}{n}}$ , then we obtain that for  $n$  sufficiently large (such that  $n \geq M(b, \beta, K, \tau)/2$  and  $\tau \leq T(b, \beta, K)$ ), we have that with a probability of at least  $1 - \delta$

$$\left| \text{LOT}_{r,c}(\mu, \nu) - \int_{\mathbb{Z}^2} c(x, y) d\hat{\pi}(x, y) \right| \leq 4\|c\|_\infty \left[ 1 + \frac{1}{\min_{1 \leq i \leq r} \lambda_i^*} \sqrt{\frac{2 \log(n)}{n}} \right] \sqrt{\frac{4 \log(4/\delta)}{n}}$$

$$\leq 4\|c\|_\infty \sqrt{\frac{4 \log(4/\delta)}{n}} + \frac{16\sqrt{5}\|c\|_\infty \sqrt{\log(n) \log(4/\delta)}}{n \times \min_{1 \leq i \leq r} \lambda_i^*}$$

Recall also from the proof of Proposition 4 that we have with a probability of at least  $1 - \delta$

$$\left| \int_{\mathbb{Z}^2} c(x, y) d[\hat{\pi}(x, y) - \tilde{\pi}(x, y)] \right| \leq \|c\|_\infty \left[ 11\sqrt{\frac{r}{n}} + 12\sqrt{\frac{2 \ln 40/\delta}{n}} + \frac{6 \ln(40/\delta) + 2\sqrt{2r \ln(40/\delta)}}{n \times \min_{1 \leq i \leq r} \lambda_i^*} \right]$$

Finally by imposing in addition that

$$\sqrt{\frac{n}{\log(n)}} \geq \frac{1}{\min_{1 \leq i \leq r} \lambda_i^*}, \quad \sqrt{n} \geq \frac{\sqrt{\log(40/\delta)}}{\min_{1 \leq i \leq r} \lambda_i^*} \quad \text{and} \quad \sqrt{n} \geq \frac{\sqrt{r}}{\min_{1 \leq i \leq r} \lambda_i^*}$$

we obtain that for  $n$  is large enough (such that  $n \geq M(b, \beta, K, \tau)/2$  and  $\tau \leq T(b, \beta, K)$ ) and satysfing the above inequalities, we have with a probability of at least  $1 - 2\delta$  that

$$\text{LOT}_{r,c}(\hat{\mu}, \hat{\nu}) - \text{LOT}_{r,c}(\mu, \nu) \leq 11\|c\|_\infty \sqrt{\frac{r}{n}} + 77\|c\|_\infty \sqrt{\frac{\log(40/\delta)}{n}}$$

□

## B.6 Proof Proposition 6

**Proposition.** Let  $\mu, \nu \in \mathcal{M}_1^+(\mathcal{X})$ . Let us assume that  $c$  is symmetric, then we have

$$\text{DLOT}_{1,c}(\mu, \nu) = \frac{1}{2} \int_{\mathcal{X}^2} -c(x, y) d[\mu - \nu] \otimes d[\mu - \nu](x, y) .$$

If in addition we assume the  $c$  is Lipschitz w.r.t to  $x$  and  $y$ , then we have

$$\text{DLOT}_{r,c}(\mu, \nu) \xrightarrow{r \rightarrow +\infty} \text{OT}_c(\mu, \nu) .$$

*Proof.* When  $r = 1$ , it is clear that for any  $\mu, \nu \in \mathcal{M}_1^+(\mathcal{X})$ ,  $\Pi_r(\mu, \nu) = \{\mu \otimes \nu\}$  and thanks to the symmetry of  $c$ , we have directly that

$$\text{DLOT}_{1,c}(\mu, \nu) = \frac{1}{2} \int_{\mathcal{X}^2} -c(x, y) d[\mu - \nu] \otimes d[\mu - \nu](x, y) = \frac{1}{2} \text{MMD}_{-c}(\mu, \nu) .$$

The limit is a direct consequence of Proposition 2

□

## B.7 Proof of Proposition 8

**Proposition.** Let  $r \geq 1$  and  $(\mu_n)_{n \geq 0}$  and  $(\nu_n)_{n \geq 0}$  two sequences of probability measures such that  $\mu_n \rightarrow \mu$  and  $\nu_n \rightarrow \nu$  with respect to the convergence in law. Then we have that

$$\text{LOT}_{r,c}(\mu_n, \nu_n) \rightarrow \text{LOT}_{r,c}(\mu, \nu) .$$

*Proof.* Let us denote  $\pi$  an optimal solution of  $\text{LOT}_{r,c}(\mu, \nu)$  and let us denote  $(\mu^{(i)})_{i=1}^r, (\nu^{(i)})_{i=1}^r$  and  $(\lambda^{(i)})_{i=1}^r$  the decomposition associated. In the following Lemma, we aim at building specific decompositions of the sequences  $(\mu_n)_{n \geq 0}$  and  $(\nu_n)_{n \geq 0}$ .

**Lemma 1.** Let  $r \geq 1$ ,  $\mu \in \mathcal{M}_1^+(\mathcal{X})$  and  $(\mu^{(i)})_{i=1}^r \in \mathcal{M}_1^+(\mathcal{X})$  and  $(\lambda^{(i)})_{i=1}^r \in \Delta_r^*$  such that  $\mu = \sum_{i=1}^r \lambda_i \mu^{(i)}$ . Then for any sequence of probability measures  $(\mu_n)_{n \geq 0}$  such that  $\mu_n \rightarrow \mu$ , there exist for all  $i \in [1, r]$  a sequence of nonnegative measures  $(\mu_n^{(i)})_{n \geq 0}$  such that

$$\begin{aligned} \mu_n^{(i)} &\rightarrow \lambda_i \mu^{(i)} \text{ for all } i \in [1, r] \text{ and} \\ \sum_{i=1}^r \mu_n^{(i)} &= \mu_n \text{ for all } n \geq 0 \end{aligned}$$

*Proof.* For  $r = 1$  the result is clear. Let us now show the result for  $r = 2$ . Let us denote  $(\tilde{\mu}_n^{(1)})$  a sequence converging weakly towards  $\lambda_1 \mu^{(1)}$ . Then by denoting  $\mu_n^{(1)} \triangleq \mu_n - (\mu_n - \tilde{\mu}_n^{(1)})_+$  where  $(\cdot)_+$  correspond to the non-negative part of the measure, we have that

$$\begin{aligned} \mu_n^{(1)} &\geq 0, \quad \mu_n^{(1)} \rightarrow \lambda_1 \mu^{(1)}, \\ \mu_n^{(2)} &\triangleq \mu_n - \mu_n^{(1)} \geq 0, \quad \mu_n^{(2)} \rightarrow \lambda_2 \mu^{(2)} \text{ and} \\ \mu_n &= \mu_n^{(1)} + \mu_n^{(2)} \text{ for all } n \geq 0 \end{aligned}$$

which is the result. Let  $r \geq 2$  and let us assume that the result holds for all  $1 \leq k \leq r$ . Let us now consider a decomposition of  $\mu$  such that  $\mu = \sum_{i=1}^{r+1} \lambda_i \mu^{(i)}$ . By denoting  $\tilde{\mu}^{(1)} \triangleq \frac{\sum_{i=1}^r \lambda_i \mu^{(i)}}{\sum_{i=1}^r \lambda_i}$ , we obtain that

$$\mu = \left( \sum_{i=1}^r \lambda_i \right) \tilde{\mu}^{(1)} + \lambda_{r+1} \mu^{(r+1)}.$$

Then by recursion we have that there exists sequences of nonnegative measures  $(\tilde{\mu}_n^{(1)})$  and  $(\mu_n^{(r+1)})$  such that

$$\tilde{\mu}_n^{(1)} \rightarrow \left( \sum_{i=1}^r \lambda_i \right) \tilde{\mu}^{(1)}, \quad \mu_n^{(r+1)} \rightarrow \lambda_{r+1} \mu^{(r+1)} \quad \text{and} \quad \mu_n = \tilde{\mu}_n^{(1)} + \mu_n^{(r+1)} \quad \text{for all } n \geq 0$$

Now observe that  $\frac{\tilde{\mu}_n^{(1)}}{|\tilde{\mu}_n^{(1)}|} \rightarrow \tilde{\mu}^{(1)} = \sum_{i=1}^r \frac{\lambda_i}{\sum_{i=1}^r \lambda_i} \mu^{(i)}$ . Therefore applying the recursion on this problem allows us to obtain a decomposition of  $\tilde{\mu}_n^{(1)}$  of the form

$$\begin{aligned} \frac{\tilde{\mu}_n^{(1)}}{|\tilde{\mu}_n^{(1)}|} &= \sum_{i=1}^r \mu_n^{(i)} \quad \text{where} \\ \mu_n^{(i)} &\geq 0 \quad \text{and} \quad \mu_n^{(i)} \rightarrow \frac{\lambda_i}{\sum_{i=1}^r \lambda_i} \mu^{(i)}. \end{aligned}$$

Therefore we obtain that

$$\begin{aligned} \mu_n &= \sum_{i=1}^r |\tilde{\mu}_n^{(1)}| \mu_n^{(i)} + \mu_n^{(r+1)} \quad \text{where} \\ \mu_n^{(i)} &\geq 0, \quad |\tilde{\mu}_n^{(1)}| \mu_n^{(i)} \rightarrow \lambda_i \mu^{(i)} \quad \text{for all } i \in [1, r] \quad \text{and} \\ \mu_n^{(r+1)} &\geq 0, \quad \mu_n^{(r+1)} \rightarrow \lambda_{r+1} \mu^{(r+1)} \end{aligned}$$

from which follows the result.  $\square$

Let us now consider such decompositions of  $(\mu_n)_{n \geq 0}$  and  $(\nu_n)_{n \geq 0}$  such that each factor converges toward the target decomposition of  $\mu$ . Now let us build the following coupling:

$$\begin{aligned} \tilde{\pi}_n &\triangleq \sum_{k=1}^{r-1} \frac{\min(|\mu_n^{(k)}|, |\nu_n^{(k)}|)}{|\mu_n^{(k)}| |\nu_n^{(k)}|} \mu_n^{(k)} \otimes \nu_n^{(k)} \\ &+ \frac{1}{1 - \sum_{k=1}^{r-1} \min(|\mu_n^{(k)}|, |\nu_n^{(k)}|)} \left[ |\mu_n| - \sum_{k=1}^{r-1} \frac{\min(|\mu_n^{(k)}|, |\nu_n^{(k)}|)}{|\mu_n^{(k)}|} \mu_n^{(k)} \right] \otimes \left[ |\nu_n| - \sum_{k=1}^{r-1} \frac{\min(|\mu_n^{(k)}|, |\nu_n^{(k)}|)}{|\nu_n^{(k)}|} \nu_n^{(k)} \right] \end{aligned}$$

with the convention that  $\frac{0}{0} = 0$ . Now it is easy to check that  $\tilde{\pi}_n \in \Pi_r(\mu_n, \nu_n)$ , and we have that

$$\text{LOT}_{r,c}(\mu_n, \nu_n) \leq \int_{\mathcal{X}^2} d(x, y) d\tilde{\pi}_n(x, y) \rightarrow \text{LOT}_{r,c}(\mu, \nu)$$

and by Prokhorov's theorem and the optimality of the limit of  $(\tilde{\pi}_n)_{n \geq 0}$  (up to an extraction) we obtain that  $\text{LOT}_{r,c}(\mu_n, \nu_n) \rightarrow \text{LOT}_{r,c}(\mu, \nu)$ .  $\square$

## B.8 Proof Proposition 7

**Proposition.** *Let  $r \geq 1$ , and let us assume that  $c$  is a semimetric of negative type. Then for all  $\mu, \nu \in \mathcal{M}_1^+(\mathcal{X})$ , we have that*

$$\text{DLOT}_r(\mu, \nu) \geq 0.$$

*In addition, if  $c$  has strong negative type then we have also that*

$$\begin{aligned} \text{DLOT}_{r,c}(\mu, \nu) = 0 &\iff \mu = \nu \quad \text{and} \\ \mu_n \rightarrow \mu &\iff \text{DLOT}_{r,c}(\mu_n, \mu) \rightarrow 0. \end{aligned}$$

*where the convergence of the sequence of probability measures considered is the convergence in law.*

*Proof.* Let  $\pi^*$  solution of  $\text{LOT}_{r,c}(\mu, \nu)$ . Then there exists  $\lambda^* \in \Delta_r^*$ ,  $(\mu_i^*)_{i=1}^r, (\nu_i^*)_{i=1}^r \in \mathcal{M}_1^+(\mathcal{X})^r$  such that

$$\pi^* = \sum_{i=1}^r \lambda_i^* \mu_i^* \otimes \nu_i^*.$$

Note that by definition, we have that

$$\mu = \sum_{i=1}^r \lambda_i^* \mu_i^* \text{ and } \nu = \sum_{i=1}^r \lambda_i^* \nu_i^*,$$

By definition we have also that

$$\text{LOT}_{r,c}(\mu, \mu) \leq \sum_{k=1}^r \lambda_k^* \int_{\mathcal{X}^2} c(x, y) d\mu_k^* \otimes \mu_k^*$$

similarly for  $\text{LOT}_{r,c}(\nu, \nu)$  we have

$$\text{LOT}_{r,c}(\nu, \nu) \leq \sum_{k=1}^r \lambda_k^* \int_{\mathcal{X}^2} c(x, y) d\nu_k^* \otimes \nu_k^*$$

Therefore we have

$$\begin{aligned} \text{DLOT}_{r,c}(\mu, \nu) &\geq \sum_{k=1}^r \lambda_k^* \left( \int_{\mathcal{X}^2} c(x, y) d\mu_k^* \otimes \nu_k^* - \frac{1}{2} \left[ \int_{\mathcal{X}^2} c(x, y) d\mu_k^* \otimes \mu_k^* + \int_{\mathcal{X}^2} c(x, y) d\nu_k^* \otimes \nu_k^* \right] \right) \\ &\geq \sum_{k=1}^r \lambda_k^* \int_{\mathcal{X}^2} -c(x, y) d[\mu_k^* - \nu_k^*] \otimes [\mu_k^* - \nu_k^*] \\ &\geq \sum_{k=1}^r \frac{\lambda_k^*}{2} D_c(\mu_k^*, \nu_k^*) \end{aligned}$$

where for any any probability measures  $\alpha, \beta$  on  $\mathcal{X}$  we define

$$D_c(\alpha, \beta) \triangleq 2 \int_{\mathcal{X}^2} c(x, y) d\alpha \otimes \beta - \int_{\mathcal{X}^2} c(x, y) d\alpha \otimes \alpha - \int_{\mathcal{X}^2} c(x, y) d\beta \otimes \beta$$

However, as  $c$  is assumed to have a negative type, we have that

$$D_c(\mu_k^*, \nu_k^*) \geq 0 \quad \forall k$$

In addition if we assume that  $c$  has a strong negative type, then we obtain directly that

$$\text{DLOT}_{r,c}(\mu, \nu) = 0 \implies \mu_k^* = \nu_k^* \quad \forall k.$$

Let us now show that  $\text{DLOT}_{r,c}$  metrize the convergence in law. The direct implication is a direct consequence of the Proposition 8. Conversely, if  $\text{DLOT}_{r,c}(\mu_n, \mu) \rightarrow 0$ , then by compacity of  $\mathcal{X}$  and thanks to the Prokhorov's theorem we can extract a subsequence of  $\mu_n \rightarrow \mu^*$ , and thanks to Proposition 8, we also obtain that  $\text{DLOT}_{r,c}(\mu_n, \mu) \rightarrow \text{DLOT}_{r,c}(\mu^*, \mu)$ . Finally we deduce that  $\text{DLOT}_{r,c}(\mu^*, \mu) = 0$  and  $\mu^* = \mu$ .

□

## B.9 Proof Proposition 9

**Proposition.** Let  $n \geq k \geq 1$ ,  $\mathbf{X} \triangleq \{x_1, \dots, x_n\} \subset \mathcal{X}$  and  $a \in \Delta_n^*$ . If  $c$  is a semimetric of negative type, then by denoting  $C = (c(x_i, x_j))_{i,j}$ , we have that

$$\text{LOT}_{k,c}(\mu_a, \mathbf{X}, \mu_a, \mathbf{X}) = \min_Q \langle C, Q \text{diag}(1/Q^T \mathbf{1}_n) Q^T \rangle \text{ s.t. } Q \in \mathbb{R}_+^{n \times k}, \quad Q \mathbf{1}_k = a. \quad (16)$$

*Proof.* First remarks that one can reformulate the  $\text{LOT}_{k,c}$  problem as

$$\text{LOT}_{k,c}(\mu, \mu) \triangleq \min_{g \in \Delta_k^*} \min_{(\mathbf{x}, \mathbf{y}) \in K_{a,g}^2} \sum_{i=1}^k \frac{\mathbf{x}_i^T C \mathbf{y}_i}{g_i}$$

where

$$K_{a,g} \triangleq \{\mathbf{x} \in \mathbb{R}^{nk} \text{ s.t. } A\mathbf{x} = [a, g]^T, \mathbf{x} \geq 0\}$$

$$A \triangleq \begin{pmatrix} \mathbf{1}_n^T \otimes \mathbb{I}_k \\ \mathbb{I}_n^T \otimes \mathbf{1}_k \end{pmatrix} \text{ and}$$

$$\mathbf{x}_i \triangleq [x_{(i-1) \times n + 1}, \dots, x_{i \times n}]^T, \mathbf{y}_i \triangleq [y_{(i-1) \times n + 1}, \dots, y_{i \times n}]^T \text{ for all } i \in [1, k]$$

Indeed the above optimization problem is just a reformulation of  $\text{LOT}_{k,c}(\mu, \mu)$  where we have vectorized the couplings in a column-wise order. Let us now show the following lemma from which the result will follow.

**Lemma 2.** *Under the same assumption of Proposition 9 we have that for all  $g \in \Delta_k^*$*

$$\min_{(\mathbf{x}, \mathbf{y}) \in K_{a,g}^2} \sum_{i=1}^k \frac{\mathbf{x}_i^T C \mathbf{y}_i}{g_i} = \min_{\mathbf{x} \in K_{a,g}} \sum_{i=1}^k \frac{\mathbf{x}_i^T C \mathbf{x}_i}{g_i}$$

*Proof.* Let  $(\mathbf{x}^*, \mathbf{y}^*)$  solution of the LHS optimization problem. Then we have that

$$\begin{aligned} \sum_{i=1}^k \frac{(\mathbf{x}_i^*)^T C \mathbf{x}_i^*}{g_i} &\geq \sum_{i=1}^k \frac{(\mathbf{x}_i^*)^T C \mathbf{y}_i^*}{g_i} \\ \sum_{i=1}^k \frac{(\mathbf{y}_i^*)^T C \mathbf{y}_i^*}{g_i} &\geq \sum_{i=1}^k \frac{(\mathbf{x}_i^*)^T C \mathbf{y}_i^*}{g_i} \end{aligned}$$

Therefore we obtain that

$$\begin{aligned} 0 &\leq \sum_{i=1}^k \frac{(\mathbf{x}_i^*)^T C \mathbf{x}_i^*}{g_i} - \sum_{i=1}^k \frac{(\mathbf{x}_i^*)^T C \mathbf{y}_i^*}{g_i} = \sum_{i=1}^k \frac{(\mathbf{x}_i^*)^T C (\mathbf{x}_i^* - \mathbf{y}_i^*)}{g_i} \\ 0 &\leq \sum_{i=1}^k \frac{(\mathbf{y}_i^*)^T C \mathbf{y}_i^*}{g_i} - \sum_{i=1}^k \frac{(\mathbf{x}_i^*)^T C \mathbf{y}_i^*}{g_i} = \sum_{i=1}^k \frac{(\mathbf{y}_i^* - \mathbf{x}_i^*)^T C \mathbf{y}_i^*}{g_i} \end{aligned}$$

Then by symmetry of  $C$ , we obtain by adding the two terms that

$$\sum_{i=1}^k \frac{(\mathbf{x}_i^* - \mathbf{y}_i^*)^T C (\mathbf{x}_i^* - \mathbf{y}_i^*)}{g_i} \geq 0$$

However, thanks to the linear constraints, we have that for all  $i \in [1, k]$ ,

$$\sum_{q=0}^{n-1} x_{(i-1) \times n + 1 + q}^* = \sum_{q=0}^{n-1} y_{(i-1) \times n + 1 + q}^* = g_i$$

Therefore  $(\mathbf{x}_i^* - \mathbf{y}_i^*)^T \mathbf{1}_n = 0$  and thanks to the negativity of the cost function  $c$  we obtain that

$$(\mathbf{x}_i^* - \mathbf{y}_i^*)^T C (\mathbf{x}_i^* - \mathbf{y}_i^*) \leq 0$$

Therefore we have that

$$(\mathbf{x}_i - \mathbf{y}_i)^T C (\mathbf{x}_i - \mathbf{y}_i) = 0$$

from which follows that

$$\sum_{i=1}^k \frac{(\mathbf{x}_i^*)^T C \mathbf{x}_i^*}{g_i} = \sum_{i=1}^k \frac{(\mathbf{x}_i^*)^T C \mathbf{y}_i^*}{g_i} = \sum_{i=1}^k \frac{(\mathbf{y}_i^*)^T C \mathbf{y}_i^*}{g_i}$$

and the result follows.  $\square$

As the above result holds for any  $g \in \Delta_k^*$ , we obtain that

$$\text{LOT}_{k,c}(\mu, \mu) = \min_{g \in \Delta_k^*} \min_{\mathbf{x} \in K_{a,g}} \sum_{i=1}^k \frac{(\mathbf{x}_i^*)^T C \mathbf{x}_i^*}{g_i}$$

Then by formulating back this problem in term of matrices, we obtain that

$$\text{LOT}_{k,c}(\mu, \mu) = \min_{g \in \Delta_k^*} \min_{Q \in \Pi_{a,g}} \langle C, Q \text{diag}(1/g) Q^T \rangle$$

from which the result follows.  $\square$

## C Additional Experiments

### C.1 Comparison of the $\gamma$ schedules

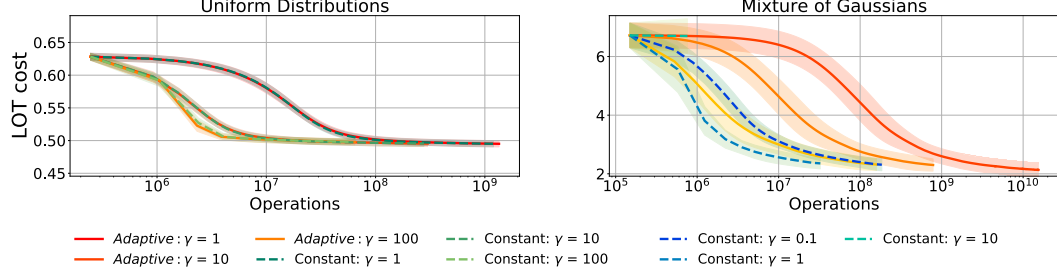

Figure 5: In this experiment, we compare two strategies for the choice of the step-size in the MD scheme proposed by [Scetbon et al. \[2021\]](#) on two different problems. More precisely, we compare the constant  $\gamma$  schedule with the proposed adaptive one and compare them when the distributions are sampled from either uniform distributions (*left*) or mixtures of anisotropic Gaussians (*right*). We show that the range of admissible  $\gamma$  when considering a constant schedule varies from one problem to another. Indeed, in the right plot, we observe that the algorithm converges only when  $\gamma \leq 1$ , while in the left plot, the algorithm manages to converge for  $\gamma \leq 100$ . We also observe that our adaptive strategy allows to have a consistent choice of admissible values for  $\gamma$  whatever the problem considered. It is worth noticing that whatever the  $\gamma$  chosen, the algorithm converges towards the same value, however the larger  $\gamma$  is chosen in its admissible range, the faster the algorithm converges.

### C.2 Gradient Flows between two Moons

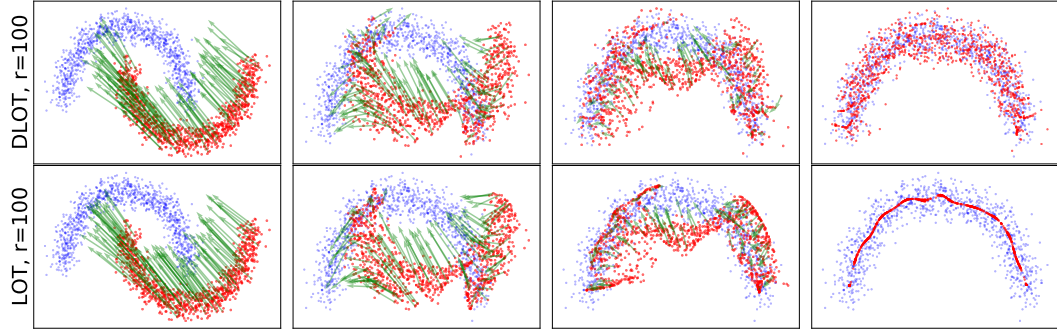

Figure 6: We compare the gradient flows  $(\mu_t)_{t \geq 0}$  (in red) starting from a moon shape distribution,  $\mu_0$ , to another moon shape distribution (in blue),  $\nu$ , in 2D when minimizing either  $L(\mu) \triangleq \text{DLOT}_{r,c}(\mu, \nu)$  or  $L(\mu) \triangleq \text{LOT}_{r,c}(\mu, \nu)$ . The ground cost is the squared Euclidean distance and we fix  $r = 100$ . We consider 1000 samples from each distribution and we plot the evolution of the probability measure obtained along the iterations of a gradient descent scheme. We also display the vector field in the descent direction. We show that the debiased version allows to recover the target distribution while  $\text{LOT}_{r,c}$  is learning a biased version with a low-rank structure.
